# Supplementary material for: Y1-receptor–ligand-functionalized ultrasmall upconversion nanoparticles for tumor-targeted trimodality imaging and photodynamic therapy with low toxicity
Source: Royal Society of Chemistry journal article supplement (doi:10.1039/c8nr02387e), 2018-01-01
Supplement: c8nr02387e1.pdf [file c8nr02387e1.pdf]

## Supporting Information

### **Y<sub>1</sub> receptor ligand functionalized ultrasmall upconversion nanoparticles for tumor-targeted trimodality imaging and photodynamic therapy with low toxicity**

Zhangsen Yu<sup>a,b</sup>, Yuanzhi Xia<sup>a</sup>, Jie Xing<sup>a,b</sup>, Zihou Li<sup>a,b</sup>, Jianjun Zhen<sup>c</sup>, Yinhua Jin<sup>c</sup>,  
Yuchen Tian<sup>a</sup>, Chuang Liu<sup>a,b</sup>, Zhenqi Jiang<sup>a,b</sup>, Juan Li<sup>a,\*</sup>, Aiguo Wu<sup>a,\*</sup>

<sup>a</sup> *CAS Key Laboratory of Magnetic Materials and Devices, Key Laboratory of Additive Manufacturing Materials of Zhejiang Province, and Division of Functional Materials and Nanodevices, Ningbo Institute of Materials Technology and Engineering, Chinese Academy of Sciences, Ningbo 315201, China*

<sup>b</sup> *University of Chinese Academy of Sciences, Beijing 100049, China*

<sup>c</sup> *Department of Radiology, Ningbo No.2 Hospital, Ningbo 315010, China*

*\* Corresponding author. E-mail: aiguo@nimte.ac.cn*

*E-mail: lij@nimte.ac.cn*

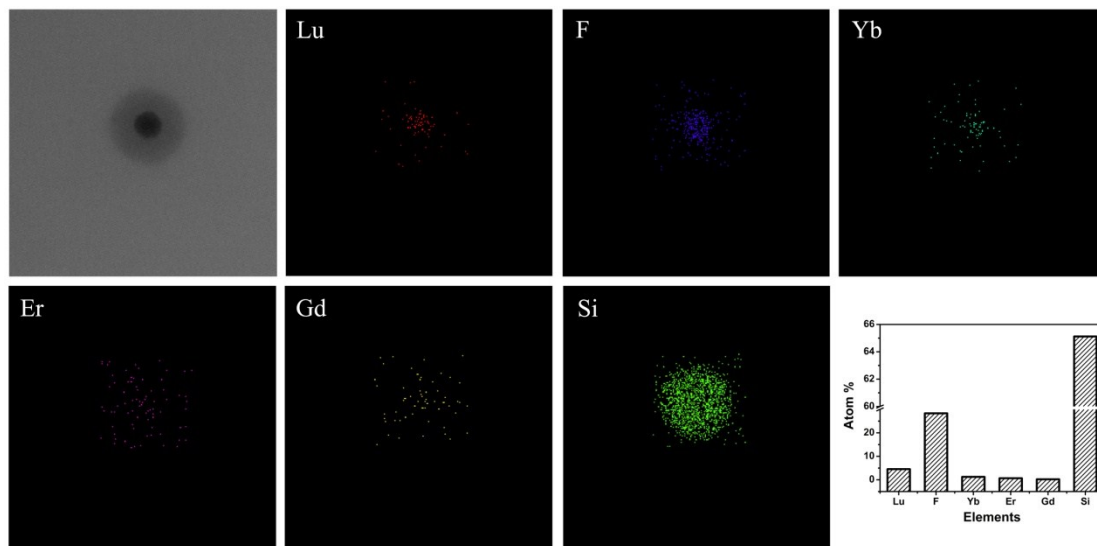

Fig. S1. EDS elemental mapping of Lu, F, Yb, Er, Gd, and Si in MNPs nanocomposites.

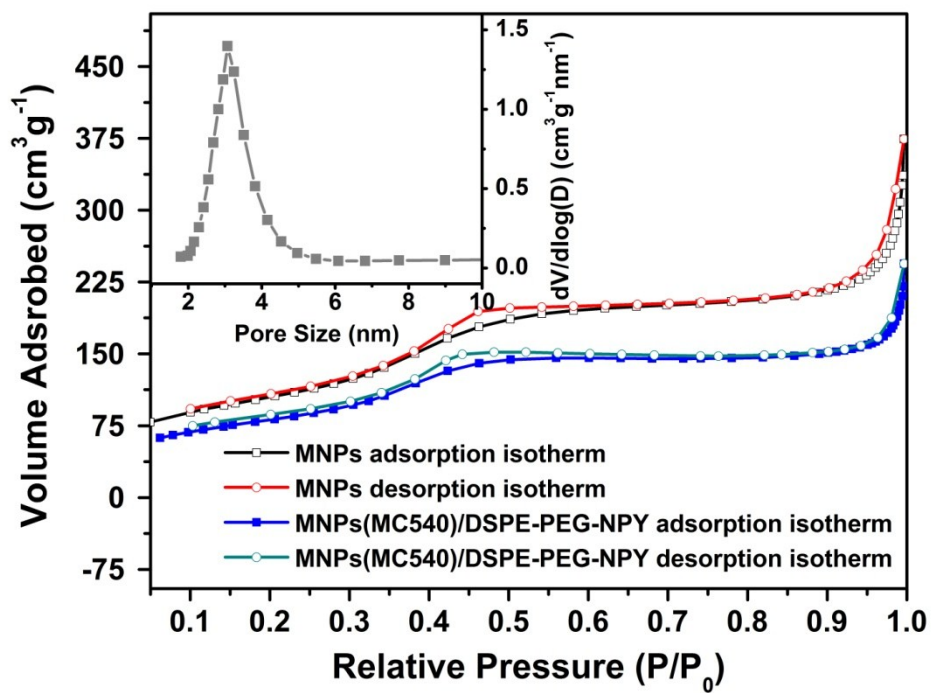

Fig. S2 N<sub>2</sub> adsorption-desorption isotherm and corresponding pore-size distributions of MNPs and MNPs(MC540)/DSPE-PEG-NPY nanocomposites.

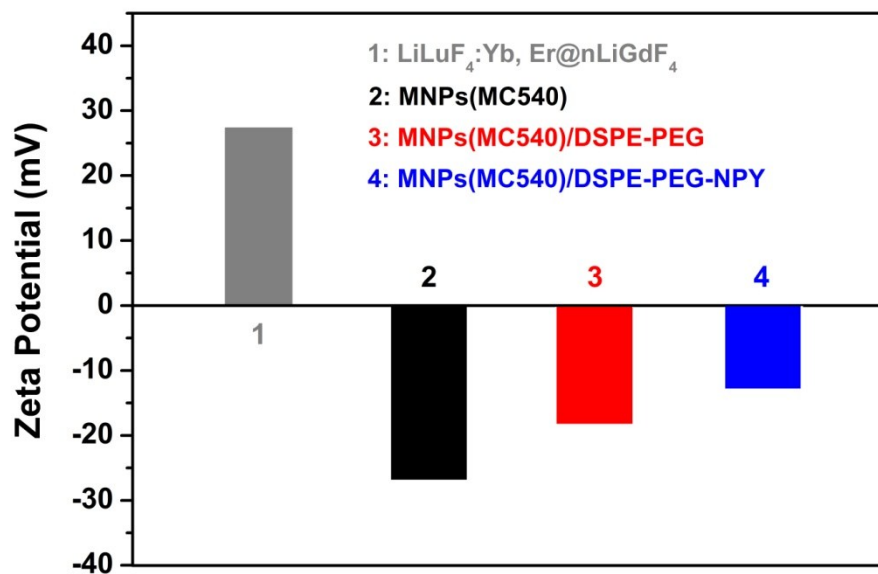

Fig. S3 Zeta Potential of  $\text{LiLuF}_4:\text{Yb,Er}@n\text{LiGdF}_4$ ,  $\text{MNPs}(\text{MC540})$ ,  $\text{MNPs}(\text{MC540})/\text{DSPE-PEG}$  and  $\text{MNPs}(\text{MC540})/\text{DSPE-PEG-NPY}$  nanocomposites.

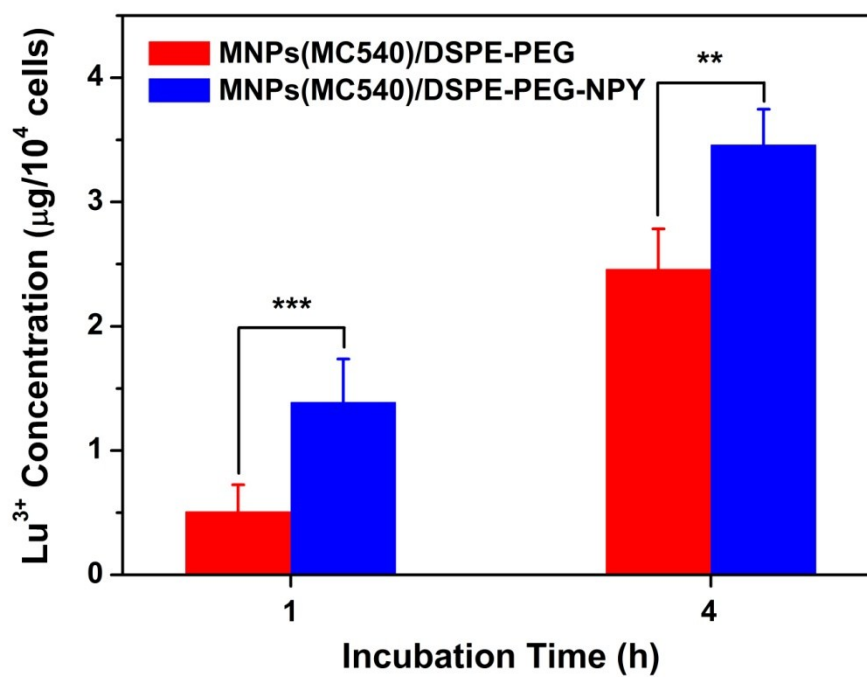

Fig. S4 Quantification of the cellular uptake of MNPs(MC540)/DSPE-PEG and MNPs(MC540)/DSPE-PEG-NPY by ICP-MS with the incubation time of 1 or 4 h. \*\* indicates  $p < 0.01$  while \*\*\* indicates  $p < 0.001$ .

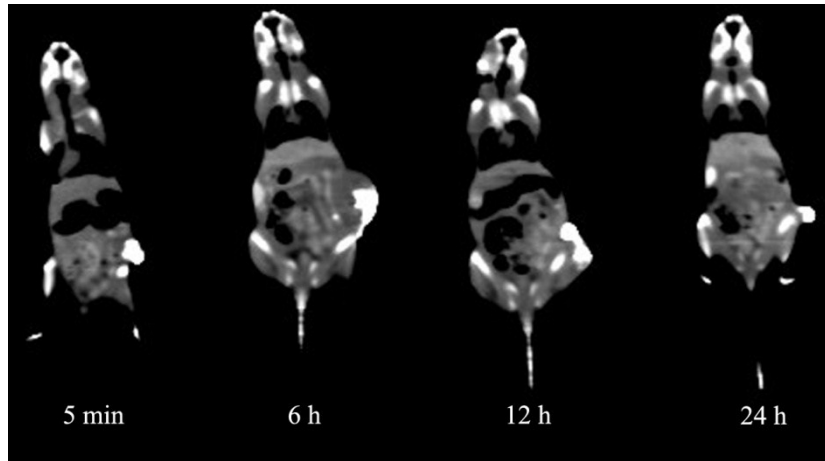

Fig. S5 *In vivo* coronal CT images of MNPs(MC540)/DSPE-PEG-NPY nanocomposites with a dose of 10 mg/kg in MCF-7 tumor bearing mice at different time points post intratumoral injection.

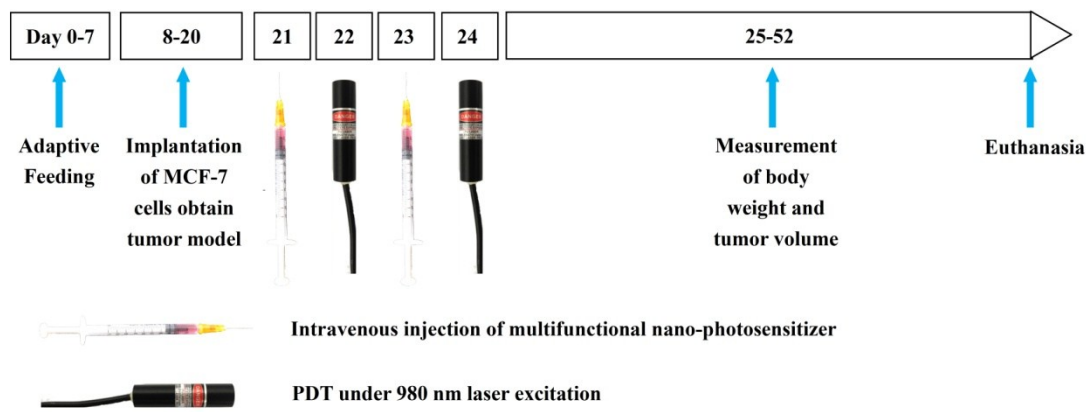

Fig. S6 The process of PDT treatment for MCF-7 tumor bearing mice.

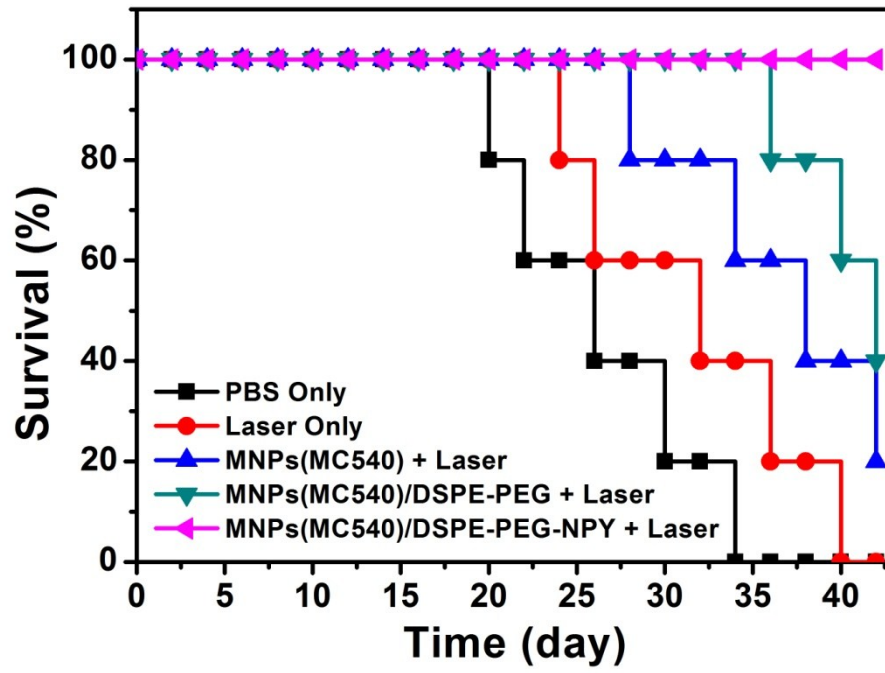

Fig. S7 Survival curves of the MCF-7 cells bearing nude mice after different treatments.



Table S1 The UF intensity of green and red band and the G/R ratio of different nanocomposites

| <b>Nanoparticles</b>                             | <b>Green Band<br/>(500-575 nm)</b> | <b>Red Band<br/>(630-690 nm)</b> | <b>G/R ratio</b> |
|--------------------------------------------------|------------------------------------|----------------------------------|------------------|
| <b>LiLuF<sub>4</sub>:Yb,Er</b>                   | 1.40*10 <sup>6</sup>               | 0.44 *10 <sup>6</sup>            | 3.18             |
| <b>LiLuF<sub>4</sub>:Yb,Er@LiGdF<sub>4</sub></b> | 7.66 *10 <sup>6</sup>              | 2.38 *10 <sup>6</sup>            | 3.22             |
| <b>MNPs</b>                                      | 4.52 *10 <sup>6</sup>              | 1.58 *10 <sup>6</sup>            | 2.86             |
| <b>MNPs(MC540)</b>                               | 2.50 *10 <sup>6</sup>              | 1.88 *10 <sup>6</sup>            | 1.33             |
| <b>MNPs(MC540)/DSPE-PEG</b>                      | 2.08 *10 <sup>6</sup>              | 1.51*10 <sup>6</sup>             | 1.38             |
| <b>MNPs(MC540)/DSPE-PEG-NPY</b>                  | 1.98 *10 <sup>6</sup>              | 1.35 *10 <sup>6</sup>            | 1.47             |
